# Supplementary material for: Synthetic data analysis for early detection of Alzheimer progression through machine learning algorithms
Source: PeerJ journal article supplement (doi:10.7717/peerj-cs.2437), 2024-12-12
Supplement: 99755SuppFilesStaffHC.pdf [file 99755SuppFilesStaffHC.pdf]

# SYNTHETIC DATA ANALYSIS FOR EARLY DETECTION OF ALZHEIMER PROGRESSION THROUGH MACHINE LEARNING ALGORITHMS

Ana G. Sánchez-Reyna, Ricardo Mendoza-González, Huizilopoztli Luna-García, José M. Celaya-Padilla, Jorge A. Morgan-Benita, Carlos H. Espino-Salinas, Jorge I. Galván-Tejada, David Rondon and Klinge O. Villalba-Condori

## Supplemental Experimental Results

As part of the work developed, the following extra results were obtained.

These features were processed by RFE and AIC, obtaining diverse sets of features that were then integrated into the ML models within the ensemble (see Table S1 and Table S2).

| Experiment              | Dataset | Features                                                                                          |
|-------------------------|---------|---------------------------------------------------------------------------------------------------|
| CNvSMC<br>(phase 1)     | Orig    | “FAQ”                                                                                             |
|                         | Syn     | “AGE”, “ADAS11”, “ADAS13” and “TRABSCOR”                                                          |
|                         | Custom  | “AGE” and “ADAS13”                                                                                |
| CNvsEMCI<br>(phase 1)   | Orig    | “PTGENDER”, “CDRSB” and “FAQ”                                                                     |
|                         | Syn     | “PTGENDER”, “CDRSB” and “FAQ”                                                                     |
|                         | Custom  | “PTGENDER”, “CDRSB” and “FAQ”                                                                     |
| CNvsLMCI<br>(phase 1)   | Orig    | “CDRSB”, “LDELTOTAL” and “FAQ”                                                                    |
|                         | Syn     | “CDRSB”, “LDELTOTAL” and “FAQ”                                                                    |
|                         | Custom  | “CDRSB”, “LDELTOTAL” and “FAQ”                                                                    |
| CNvsAD<br>(phase 1)     | Orig    | “FAQ”                                                                                             |
|                         | Syn     | “FAQ”                                                                                             |
|                         | Custom  | “FAQ”                                                                                             |
| SMCvsEMCI<br>(phase 1)  | Orig    | “AGE”, “CDRSB” and “TRABSCOR”                                                                     |
|                         | Syn     | “AGE”, “CDRSB” and “TRABSCOR”                                                                     |
|                         | Custom  | “AGE”, “CDRSB” and “TRABSCOR”                                                                     |
| SMCvsLMCI<br>(phase 1)  | Orig    | “AGE”, “CDRSB”, “ADAS11”, “ADAS13”, “RAVLT.immediate”, “LDELTOTAL” and “TRABSCOR”                 |
|                         | Syn     | “PTGENDER”, “PTMARRY”, “CDRSB”, “ADAS11”, “ADAS13”, “ADASQ4”, “MMSE” and “LDELTOTAL”              |
|                         | Custom  | “ADAS13” and “LDELTOTAL”                                                                          |
| SMCvsAD<br>(phase 1)    | Orig    | “CDRSB”, “ADAS13”, “ADASQ4”, “RAVLT.immediate”, “RAVLT.learning”, “LDELTOTAL” and “FAQ”           |
|                         | Syn     | “CDRSB”, “ADAS13”, “ADASQ4”, “RAVLT.immediate”, “LDELTOTAL” and “FAQ”                             |
|                         | Custom  | “ADAS13”                                                                                          |
| EMCIvsLMCI<br>(phase 1) | Orig    | “AGE”, “ADAS11”, “ADAS13”, “RAVLT.immediate”, “LDELTOTAL”, “TRABSCOR” and “FAQ”                   |
|                         | Syn     | “AGE”, “ADAS11”, “ADAS13”, “ADASQ4”, “MMSE”, “RAVLT.immediate”, “LDELTOTAL”, “TRABSCOR” and “FAQ” |
|                         | Custom  | “AGE”, “ADAS13” and “RAVLT.immediate”                                                             |
| EMCIvsAD<br>(phase 1)   | Orig    | “CDRSB”, “ADAS13”, “LDELTOTAL”, “TRABSCOR” and “FAQ”                                              |
|                         | Syn     | “CDRSB”, “ADAS11”, “ADAS13”, “RAVLT.immediate”, “RAVLT.learning”, “LDELTOTAL” and “TRABSCOR”      |
|                         | Custom  | “CDRSB” and “ADAS13”                                                                              |
| LMCIvsAD<br>(phase 1)   | Orig    | “RAVLT.learning”                                                                                  |
|                         | Syn     | “AGE”, “CDRSB”, “RAVLT.immediate”, “RAVLT.learning” and “FAQ”                                     |
|                         | Custom  | “AGE” and “CDRSB”                                                                                 |

**Table S1.** Summary of the features of each dataset from phase 1 of the experiments.

The Table S3 shows the comparison between the number of subjects in the original data set according to the degree of cognitive impairment with the number of subjects in the synthetic data set.

The mean and standard deviation were calculated to analyze the central tendency and statistical dispersion of the data, for the CN vs SMC (phase 1) datasets, the results of these statistical calculations

| Experiment           | Dataset | Features                                                                      |
|----------------------|---------|-------------------------------------------------------------------------------|
| CNvsMCI<br>(phase 2) | Orig    | “PTGENDER”, “CDRSB” and “ADAS11”                                              |
|                      | Syn     | “PTGENDER” and “CDRSB”                                                        |
|                      | Custom  | “CDRSB”                                                                       |
| CNvsAD<br>(phase 2)  | Orig    | “CDRSB”, “ADASQ4”, “RAVLT.learning”                                           |
|                      | Syn     | “RAVLT.immediate”, “FAQ”                                                      |
|                      | Custom  | “RAVLT.immediate”, “FAQ”                                                      |
| MCIvsAD<br>(phase 2) | Orig    | “FAQ”                                                                         |
|                      | Syn     | “CDRSB”, “ADAS13”, “RAVLT.immediate”, “RAVLT.learning”, “LDELTOTAL” and “FAQ” |
|                      | Custom  | “ADAS13”                                                                      |

**Table S2.** Summary of the features of each dataset from phase 2 of the experiments.

| Dataset              | Orig Dataset<br>No. Subjects |      | Syn Dataset<br>No. Subjects |      |
|----------------------|------------------------------|------|-----------------------------|------|
| CNvsSMC (phase 1)    | CN                           | SMC  | CN                          | SMC  |
|                      | 85                           | 49   | 85                          | 85   |
| CNvsEMCI (phase 1)   | CN                           | EMCI | CN                          | EMCI |
|                      | 85                           | 88   | 88                          | 88   |
| CNvsLMCI (phase 1)   | CN                           | LMCI | CN                          | LMCI |
|                      | 85                           | 79   | 85                          | 85   |
| CNvsAD (phase 1)     | CN                           | AD   | CN                          | AD   |
|                      | 85                           | 22   | 85                          | 85   |
| SMCvsEMCI (phase 1)  | SMC                          | EMCI | SMC                         | EMCI |
|                      | 49                           | 88   | 88                          | 88   |
| SMCvsLMCI (phase 1)  | SMC                          | LMCI | SMC                         | LMCI |
|                      | 49                           | 79   | 79                          | 79   |
| SMCvsAD (phase 1)    | SMC                          | AD   | SMC                         | AD   |
|                      | 49                           | 22   | 49                          | 49   |
| EMCIvsLMCI (phase 1) | EMCI                         | LMCI | EMCI                        | LMCI |
|                      | 88                           | 79   | 88                          | 88   |
| EMCIvsAD (phase 1)   | EMCI                         | AD   | EMCI                        | AD   |
|                      | 88                           | 22   | 88                          | 88   |
| LMCIvsAD (phase 1)   | LMCI                         | AD   | LMCI                        | AD   |
|                      | 79                           | 22   | 79                          | 79   |
| CNvsMCI (phase 2)    | CN                           | MCI  | CN                          | MCI  |
|                      | 134                          | 167  | 167                         | 167  |
| CNvsAD (phase 2)     | CN                           | AD   | CN                          | AD   |
|                      | 134                          | 22   | 134                         | 134  |
| MCIvsAD (phase 2)    | CN                           | AD   | MCI                         | AD   |
|                      | 167                          | 22   | 167                         | 167  |

**Table S3.** Comparison of the number of subjects in the original dataset and the synthetic dataset, according to the different experimental datasets.

are presented in Table S4.

The mean and standard deviation were calculated to analyze the central tendency and statistical dispersion of the data, for the CN vs EMCI (phase 1), the results of these statistical calculations are presented in Table S5.

The mean and standard deviation were calculated to analyze the central tendency and statistical dispersion of the data, for the CN vs LMCI (phase 1) datasets, the results of these statistical calculations are presented in Table S6.

The mean and standard deviation were calculated to analyze the central tendency and statistical

| Feature          | Mean Orig | SD Orig | Mean Syn | SD Syn  |
|------------------|-----------|---------|----------|---------|
| DX.bl            | 0.3657    | 0.4834  | 0.5000   | 0.5015  |
| AGE              | 69.0948   | 5.9821  | 68.3653  | 5.9159  |
| PTGENDER         | 0.2388    | 0.4280  | 0.2176   | 0.4139  |
| PTMARRY          | 1.3731    | 0.6566  | 1.3647   | 0.6499  |
| CDRSB            | 0.1381    | 0.4309  | 0.1441   | 0.4533  |
| ADAS11           | 5.7537    | 2.9483  | 5.5591   | 2.8642  |
| ADAS13           | 8.3433    | 3.9413  | 8.1708   | 3.8903  |
| ADASQ4           | 2.3582    | 1.5139  | 2.3471   | 1.4966  |
| MMSE             | 28.8507   | 1.3683  | 28.9588  | 1.2842  |
| RAVLT.immediate  | 45.0821   | 10.1010 | 45.8000  | 11.0794 |
| RAVLT.learning   | 5.9776    | 2.1642  | 6.0353   | 2.1481  |
| RAVLT.forgetting | 3.7239    | 3.1940  | 3.6706   | 3.2450  |
| LDELTOTAL        | 12.8358   | 3.5798  | 12.8588  | 3.6460  |
| TRABSCOR         | 76.9552   | 28.7760 | 76.9706  | 29.0163 |
| FAQ              | 0.1791    | 0.8571  | 0.2059   | 0.9095  |

**Table S4.** Cognitive Normal vs Subjective Memory Concern (phase 1) datasets. Mean and standard deviation of all the features used in these models, according to the dataset to which they belong, Orig is the Original dataset and Syn is the Synthetic dataset.

| Feature          | Mean Orig | SD Orig | Mean Syn | SD Syn  |
|------------------|-----------|---------|----------|---------|
| DX.bl            | 0.5087    | 0.5014  | 0.5000   | 0.5014  |
| AGE              | 70.5671   | 7.0481  | 70.6591  | 7.0496  |
| PTGENDER         | 0.3353    | 0.4735  | 0.3409   | 0.4754  |
| PTMARRY          | 1.3642    | 0.7395  | 1.3580   | 0.7346  |
| CDRSB            | 0.6676    | 1.1145  | 0.6563   | 1.1083  |
| ADAS11           | 6.3679    | 3.7740  | 6.3616   | 3.7479  |
| ADAS13           | 9.4661    | 5.5559  | 9.4241   | 5.5266  |
| ADASQ4           | 2.8324    | 2.1297  | 2.7955   | 2.1309  |
| MMSE             | 28.3468   | 2.0954  | 28.3409  | 2.0778  |
| RAVLT.immediate  | 43.3121   | 11.4904 | 43.2614  | 11.4213 |
| RAVLT.learning   | 5.6821    | 2.5852  | 5.6818   | 2.5637  |
| RAVLT.forgetting | 3.4798    | 3.3646  | 3.5284   | 3.3669  |
| LDELTOTAL        | 12.2948   | 4.4014  | 12.3011  | 4.3694  |
| TRABSCOR         | 90.6647   | 40.3040 | 90.5852  | 40.0783 |
| FAQ              | 1.2775    | 3.1519  | 1.2557   | 3.1291  |

**Table S5.** Cognitive Normal vs Early Mild Cognitive Impairment (phase 1) datasets. Mean and standard deviation of all the features used in these models, according to the dataset to which they belong, Orig is the Original dataset and Syn is the Synthetic dataset.

22 dispersion of the data, for the CN vs AD (phase 1) datasets, the results of these statistical calculations are  
23 presented in Table S7.

24 The mean and standard deviation were calculated to analyze the central tendency and statistical  
25 dispersion of the data, for the SMC vs EMCI (phase 1) datasets, the results of these statistical calculations  
26 are presented in Table S8.

27 The mean and standard deviation were calculated to analyze the central tendency and statistical  
28 dispersion of the data, for the SMC vs LMCI (phase 1) datasets, the results of these statistical calculations  
29 are presented in Table S9.

30 The mean and standard deviation were calculated to analyze the central tendency and statistical  
31 dispersion of the data, for the SMC vs AD (phase 1) datasets, the results of these statistical calculations  
32 are presented in Table S10.

33 The mean and standard deviation were calculated to analyze the central tendency and statistical  
34 dispersion of the data, for the EMCI vs LMCI (phase 1) datasets, the results of these statistical calculations

| Feature          | Mean Orig | SD Orig | Mean Syn | SD Syn  |
|------------------|-----------|---------|----------|---------|
| DX.bl            | 0.4817    | 0.5012  | 0.5000   | 0.5015  |
| AGE              | 71.1726   | 6.6312  | 71.3559  | 6.5879  |
| PTGENDER         | 0.3171    | 0.4668  | 0.3118   | 0.4646  |
| PTMARRY          | 1.4756    | 0.7630  | 1.5000   | 0.7712  |
| CDRSB            | 1.2622    | 1.9950  | 1.4000   | 2.1951  |
| ADAS11           | 9.5995    | 7.0982  | 9.9979   | 7.4820  |
| ADAS13           | 14.5873   | 10.5089 | 15.1568  | 10.9968 |
| ADASQ4           | 4.2317    | 3.0589  | 4.3647   | 3.1297  |
| MMSE             | 27.1159   | 3.5000  | 26.9176  | 3.8252  |
| RAVLT.immediate  | 36.2927   | 12.7578 | 35.6588  | 13.0923 |
| RAVLT.learning   | 4.7073    | 2.5525  | 4.6706   | 2.5368  |
| RAVLT.forgetting | 4.2012    | 2.7917  | 4.2471   | 2.7965  |
| LDELTOTAL        | 8.9573    | 5.5665  | 8.7706   | 5.6022  |
| TRABSCOR         | 130.0732  | 86.0649 | 133.5529 | 87.5929 |
| FAQ              | 3.0549    | 5.8794  | 3.4941   | 6.3797  |

**Table S6.** Cognitive Normal vs Late Mild Cognitive Impairment (phase 1) datasets. Mean and standard deviation of all the features used in these models, according to the dataset to which they belong, Orig is the Original dataset and Syn is the Synthetic dataset.

| Feature          | Mean Orig | SD Orig | Mean Syn | SD Syn   |
|------------------|-----------|---------|----------|----------|
| DX.bl            | 0.2056    | 0.4060  | 0.5000   | 0.5015   |
| AGE              | 71.3318   | 7.0128  | 72.8959  | 7.5961   |
| PTGENDER         | 0.3271    | 0.4714  | 0.4588   | 0.4998   |
| PTMARRY          | 1.3738    | 0.6662  | 1.3235   | 0.6491   |
| CDRSB            | 1.1916    | 2.4722  | 2.6294   | 3.0636   |
| ADAS11           | 8.2864    | 6.8090  | 12.2781  | 8.5512   |
| ADAS13           | 12.1555   | 9.9124  | 18.2487  | 12.2575  |
| ADASQ4           | 3.4019    | 2.8413  | 5.1176   | 3.3403   |
| MMSE             | 27.7196   | 2.7738  | 26.2000  | 3.4256   |
| RAVLT.immediate  | 39.7664   | 12.9859 | 33.1294  | 13.7645  |
| RAVLT.learning   | 4.9626    | 2.7675  | 3.6412   | 2.8670   |
| RAVLT.forgetting | 3.7944    | 2.8409  | 3.9412   | 2.3602   |
| LDELTOTAL        | 10.7944   | 5.7326  | 7.3176   | 6.6318   |
| TRABSCOR         | 110.2523  | 81.0888 | 154.3706 | 101.7516 |
| FAQ              | 3.5607    | 8.0554  | 8.1353   | 10.3968  |

**Table S7.** Cognitive Normal vs Alzheimer Disease (phase 1) datasets. Mean and standard deviation of all the features used in these models, according to the dataset to which they belong, Orig is the Original dataset and Syn is the Synthetic dataset.

are presented in Table S11.

The mean and standard deviation were calculated to analyze the central tendency and statistical dispersion of the data, for the EMCI vs AD (phase 1) datasets, the results of these statistical calculations are presented in Table S12.

The mean and standard deviation were calculated to analyze the central tendency and statistical dispersion of the data, for the LMCI vs AD (phase 1) datasets, the results of these statistical calculations are presented in Table S13.

The mean and standard deviation were calculated to analyze the central tendency and statistical dispersion of the data, for the CN vs MCI (phase 1) datasets, the results of these statistical calculations are presented in Table S14.

The mean and standard deviation were calculated to analyze the central tendency and statistical dispersion of the data, for the CN vs AD (phase 2) datasets, the results of these statistical calculations are presented in Table S15.

| Feature          | Mean Orig | SD Orig | Mean Syn | SD Syn  |
|------------------|-----------|---------|----------|---------|
| DX.bl            | 0.6423    | 0.4811  | 0.5000   | 0.5014  |
| AGE              | 69.4423   | 7.1491  | 68.6222  | 6.8422  |
| PTGENDER         | 0.3796    | 0.4871  | 0.3239   | 0.4693  |
| PTMARRY          | 1.3285    | 0.7387  | 1.3239   | 0.7113  |
| CDRSB            | 0.8978    | 1.2159  | 0.7358   | 1.1401  |
| ADAS11           | 6.8955    | 4.0555  | 6.4491   | 3.8311  |
| ADAS13           | 10.4210   | 5.8478  | 9.7844   | 5.5436  |
| ADASQ4           | 3.1679    | 2.1948  | 2.9659   | 2.0809  |
| MMSE             | 28.2628   | 2.2072  | 28.4943  | 2.0284  |
| RAVLT.immediate  | 43.4453   | 12.4681 | 44.4659  | 12.8223 |
| RAVLT.learning   | 5.7226    | 2.5945  | 5.8466   | 2.4875  |
| RAVLT.forgetting | 3.4234    | 3.4805  | 3.4148   | 3.4432  |
| LDELTOTAL        | 11.7007   | 4.7129  | 11.9659  | 4.5505  |
| TRABSCOR         | 96.1533   | 43.4770 | 91.9943  | 41.5573 |
| FAQ              | 1.7591    | 3.4990  | 1.4318   | 3.1832  |

**Table S8.** Subjective Memory Concern vs Early Mild Cognitive Impairment (phase 1) datasets. Mean and standard deviation of all the features used in these models, according to the dataset to which they belong, Orig is the Original dataset and Syn is the Synthetic dataset.

| Feature          | Mean Orig | SD Orig | Mean Syn | SD Syn  |
|------------------|-----------|---------|----------|---------|
| DX.bl            | 0.6172    | 0.4880  | 0.5000   | 0.5016  |
| AGE              | 70.1391   | 6.7487  | 69.3905  | 6.5858  |
| PTGENDER         | 0.3594    | 0.4817  | 0.3165   | 0.4666  |
| PTMARRY          | 1.4688    | 0.7729  | 1.4430   | 0.7529  |
| CDRSB            | 1.6758    | 2.1209  | 1.3956   | 2.0096  |
| ADAS11           | 11.0730   | 7.3798  | 9.8991   | 7.1551  |
| ADAS13           | 17.0496   | 10.6510 | 15.2535  | 10.4112 |
| ADASQ4           | 4.9844    | 3.0013  | 4.4684   | 2.9748  |
| MMSE             | 26.6797   | 3.7625  | 27.1835  | 3.5599  |
| RAVLT.immediate  | 34.4609   | 13.4626 | 37.3038  | 14.6408 |
| RAVLT.learning   | 4.4766    | 2.5066  | 4.8228   | 2.5251  |
| RAVLT.forgetting | 4.3438    | 2.7506  | 4.2215   | 2.9575  |
| LDELTOTAL        | 7.3828    | 5.2693  | 8.3987   | 5.4655  |
| TRABSCOR         | 147.0313  | 90.3705 | 134.3165 | 86.4932 |
| FAQ              | 4.0703    | 6.3633  | 3.3671   | 5.9278  |

**Table S9.** Subjective Memory Concern vs Late Mild Cognitive Impairment (phase 1) datasets. Mean and standard deviation of all the features used in these models, according to the dataset to which they belong, Orig is the Original dataset and Syn is the Synthetic dataset.

48        The mean and standard deviation were calculated to analyze the central tendency and statistical  
49        dispersion of the data, for the MCI vs AD (phase 2) datasets, the results of these statistical calculations  
50        are presented in Table S16.

| Feature          | Mean Orig | SD Orig | Mean Syn | SD Syn   |
|------------------|-----------|---------|----------|----------|
| DX.bl            | 0.3099    | 0.4657  | 0.5000   | 0.5026   |
| AGE              | 69.5493   | 7.3505  | 71.3765  | 8.4053   |
| PTGENDER         | 0.4085    | 0.4950  | 0.4796   | 0.5022   |
| PTMARRY          | 1.3099    | 0.6232  | 1.2653   | 0.6016   |
| CDRSB            | 1.9014    | 2.8380  | 2.8112   | 3.1084   |
| ADAS11           | 10.2772   | 7.6048  | 12.4253  | 8.0480   |
| ADAS13           | 15.3617   | 10.8151 | 18.7212  | 11.3695  |
| ADASQ4           | 4.3380    | 2.9758  | 5.3469   | 3.1298   |
| MMSE             | 27.2394   | 3.1143  | 26.3367  | 3.3211   |
| RAVLT.immediate  | 38.2254   | 15.0325 | 33.8776  | 14.7880  |
| RAVLT.learning   | 4.6761    | 2.8323  | 3.7755   | 2.8701   |
| RAVLT.forgetting | 3.8451    | 2.8216  | 3.9796   | 2.4662   |
| LDELTOTAL        | 8.8873    | 6.1378  | 6.8469   | 6.3560   |
| TRABSCOR         | 130.7746  | 93.0148 | 155.1531 | 100.1339 |
| FAQ              | 5.6479    | 9.3107  | 8.3980   | 10.5251  |

**Table S10.** Subjective Memory Concern vs Alzheimer Disease (phase 1) datasets. Mean and standard deviation of all the features used in these models, according to the dataset to which they belong, Orig is the Original dataset and Syn is the Synthetic dataset.

| Feature          | Mean Orig | SD Orig | Mean Syn | SD Syn  |
|------------------|-----------|---------|----------|---------|
| DX.bl            | 0.4731    | 0.5008  | 0.5000   | 0.5014  |
| AGE              | 71.4204   | 7.4366  | 71.5716  | 7.3282  |
| PTGENDER         | 0.4311    | 0.4967  | 0.4261   | 0.4959  |
| PTMARRY          | 1.4371    | 0.8254  | 1.4659   | 0.8343  |
| CDRSB            | 1.8653    | 1.9220  | 1.9773   | 2.0770  |
| ADAS11           | 10.4670   | 7.0230  | 10.8901  | 7.3314  |
| ADAS13           | 16.1796   | 10.2134 | 16.7594  | 10.5791 |
| ADASQ4           | 4.8623    | 2.9998  | 5.0000   | 3.0388  |
| MMSE             | 26.6647   | 3.6016  | 26.4773  | 3.8663  |
| RAVLT.immediate  | 35.1078   | 13.5602 | 34.4375  | 13.7157 |
| RAVLT.learning   | 4.5210    | 2.7700  | 4.4659   | 2.7379  |
| RAVLT.forgetting | 3.9461    | 3.1070  | 3.9886   | 3.0799  |
| LDELTOTAL        | 8.0958    | 5.6283  | 7.9034   | 5.6261  |
| TRABSCOR         | 144.8683  | 81.3034 | 146.7898 | 82.1794 |
| FAQ              | 4.2994    | 6.0445  | 4.6705   | 6.3941  |

**Table S11.** Early Mild Cognitive Impairment vs Late Mild Cognitive Impairment (phase 1) datasets. Mean and standard deviation of all the features used in these models, according to the dataset to which they belong, Orig is the Original dataset and Syn is the Synthetic dataset.

| Feature          | Mean Orig | SD Orig | Mean Syn | SD Syn  |
|------------------|-----------|---------|----------|---------|
| DX.bl            | 0.2000    | 0.4018  | 0.5000   | 0.5014  |
| AGE              | 71.7036   | 8.1318  | 73.2920  | 8.3177  |
| PTGENDER         | 0.5000    | 0.5023  | 0.5739   | 0.4959  |
| PTMARRY          | 1.3182    | 0.7654  | 1.2841   | 0.7083  |
| CDRSB            | 2.1091    | 2.3358  | 3.2472   | 2.7589  |
| ADAS11           | 9.6393    | 6.9066  | 13.2857  | 8.3230  |
| ADAS13           | 14.6393   | 9.9475  | 19.9960  | 11.6304 |
| ADASQ4           | 4.3818    | 2.9707  | 5.7557   | 3.1172  |
| MMSE             | 27.0182   | 3.0948  | 25.7216  | 3.4237  |
| RAVLT.immediate  | 37.8727   | 14.5641 | 31.8182  | 14.2083 |
| RAVLT.learning   | 4.6727    | 3.0833  | 3.4318   | 2.9887  |
| RAVLT.forgetting | 3.4182    | 3.2464  | 3.6989   | 2.6759  |
| LDELTOTAL        | 9.4364    | 6.1711  | 6.4148   | 6.4554  |
| TRABSCOR         | 133.2545  | 78.0732 | 169.4205 | 94.3624 |
| FAQ              | 5.4364    | 7.9972  | 9.5000   | 9.9794  |

**Table S12.** Early Mild Cognitive Impairment vs Alzheimer Disease (phase 1) datasets. Mean and standard deviation of all the features used in these models, according to the dataset to which they belong, Orig is the Original dataset and Syn is the Synthetic dataset.

| Feature          | Mean Orig | SD Orig | Mean Syn | SD Syn  |
|------------------|-----------|---------|----------|---------|
| DX.bl            | 0.2178    | 0.4148  | 0.5000   | 0.5016  |
| AGE              | 72.7881   | 7.4398  | 73.7709  | 7.7463  |
| PTGENDER         | 0.4851    | 0.5023  | 0.5570   | 0.4983  |
| PTMARRY          | 1.4950    | 0.8078  | 1.3924   | 0.7473  |
| CDRSB            | 3.2030    | 2.5828  | 3.8861   | 2.6786  |
| ADAS11           | 15.1781   | 7.7539  | 16.4808  | 7.5890  |
| ADAS13           | 23.4157   | 10.5209 | 25.2150  | 10.0444 |
| ADASQ4           | 6.7921    | 2.6620  | 7.2405   | 2.4323  |
| MMSE             | 24.9010   | 3.9103  | 24.4494  | 3.6180  |
| RAVLT.immediate  | 25.9901   | 8.9280  | 24.5063  | 7.9302  |
| RAVLT.learning   | 3.0000    | 2.2136  | 2.4367   | 2.0204  |
| RAVLT.forgetting | 4.5842    | 2.0845  | 4.4557   | 1.8009  |
| LDELTOTAL        | 3.7624    | 3.5246  | 2.9304   | 3.4698  |
| TRABSCOR         | 201.0396  | 90.3411 | 211.5949 | 90.9935 |
| FAQ              | 8.6931    | 8.8111  | 11.1013  | 9.5891  |

**Table S13.** Late Mild Cognitive Impairment vs Alzheimer Disease (phase 1) datasets. Mean and standard deviation of all the features used in these models, according to the dataset to which they belong, Orig is the Original dataset and Syn is the Synthetic dataset.

| Feature          | Mean Orig | SD Orig | Mean Syn | SD Syn  |
|------------------|-----------|---------|----------|---------|
| DX.bl            | 0.5548    | 0.4978  | 0.5000   | 0.5008  |
| AGE              | 70.3850   | 6.9142  | 70.2542  | 6.7219  |
| PTGENDER         | 0.3455    | 0.4763  | 0.3383   | 0.4738  |
| PTMARRY          | 1.4086    | 0.7544  | 1.4132   | 0.7493  |
| CDRSB            | 1.0963    | 1.6928  | 0.9910   | 1.6385  |
| ADAS11           | 8.3687    | 6.0540  | 8.1796   | 5.8603  |
| ADAS13           | 12.6910   | 8.9345  | 12.3683  | 8.6373  |
| ADASQ4           | 3.7475    | 2.7476  | 3.6377   | 2.6819  |
| MMSE             | 27.6379   | 3.0318  | 27.7844  | 2.9216  |
| RAVLT.immediate  | 39.5482   | 13.1010 | 40.1287  | 12.9094 |
| RAVLT.learning   | 5.1694    | 2.6168  | 5.3473   | 2.5934  |
| RAVLT.forgetting | 3.8472    | 3.1427  | 3.9132   | 3.1559  |
| LDELTOTAL        | 10.2060   | 5.3645  | 10.4850  | 5.2343  |
| TRABSCOR         | 114.6346  | 71.8871 | 110.2844 | 69.8493 |
| FAQ              | 2.4651    | 4.9749  | 2.2216   | 4.7791  |

**Table S14.** Cognitive Normal vs Mild Cognitive Impairment (phase 2) datasets. Mean and standard deviation of all the features used in these models, according to the dataset to which they belong, Orig is the Original dataset and Syn is the Synthetic dataset.

| Feature          | Mean Orig | SD Orig | Mean Syn | SD Syn   |
|------------------|-----------|---------|----------|----------|
| DX.bl            | 0.1410    | 0.3492  | 0.5000   | 0.5009   |
| AGE              | 69.9654   | 6.7366  | 72.0743  | 7.5879   |
| PTGENDER         | 0.3077    | 0.4630  | 0.4701   | 0.5000   |
| PTMARRY          | 1.3590    | 0.6520  | 1.3209   | 0.6488   |
| CDRSB            | 0.9006    | 2.1209  | 2.6959   | 3.0313   |
| ADAS11           | 7.6517    | 5.9930  | 12.2051  | 8.4018   |
| ADAS13           | 11.2478   | 8.6302  | 18.2424  | 11.9524  |
| ADASQ4           | 3.1667    | 2.5217  | 5.1567   | 3.2322   |
| MMSE             | 28.0962   | 2.4673  | 26.1866  | 3.4330   |
| RAVLT.immediate  | 41.6987   | 12.7068 | 33.3507  | 14.2012  |
| RAVLT.learning   | 5.3333    | 2.6011  | 3.6978   | 2.8630   |
| RAVLT.forgetting | 3.7756    | 2.9894  | 3.9254   | 2.3832   |
| LDELTOTAL        | 11.2372   | 5.2611  | 7.2127   | 6.5064   |
| TRABSCOR         | 100.6218  | 70.9902 | 156.6791 | 100.6630 |
| FAQ              | 2.5833    | 6.8598  | 8.0560   | 10.2931  |

**Table S15.** Cognitive Normal vs Alzheimer Disease (phase 2) datasets. Mean and standard deviation of all the features used in these models, according to the dataset to which they belong, Orig is the Original dataset and Syn is the Synthetic dataset.



| Feature          | Mean Orig | SD Orig | Mean Syn | SD Syn  |
|------------------|-----------|---------|----------|---------|
| DX.bl            | 0.1164    | 0.3216  | 0.5000   | 0.5008  |
| AGE              | 71.8683   | 7.6571  | 73.1895  | 7.8143  |
| PTGENDER         | 0.4656    | 0.5001  | 0.5838   | 0.4937  |
| PTMARRY          | 1.4180    | 0.8055  | 1.3503   | 0.7311  |
| CDRSB            | 2.2937    | 2.3022  | 3.6123   | 2.7232  |
| ADAS11           | 11.4849   | 7.5309  | 14.7693  | 8.2621  |
| ADAS13           | 17.6648   | 10.8037 | 22.4190  | 11.3379 |
| ADASQ4           | 5.2381    | 3.0565  | 6.4581   | 2.8992  |
| MMSE             | 26.2963   | 3.6477  | 25.0449  | 3.5676  |
| RAVLT.immediate  | 33.4762   | 13.6294 | 28.0719  | 12.4276 |
| RAVLT.learning   | 4.1587    | 2.8183  | 2.9760   | 2.6291  |
| RAVLT.forgetting | 3.9630    | 2.9434  | 4.0150   | 2.3191  |
| LDELTOTAL        | 7.3280    | 5.7712  | 4.7904   | 5.5387  |
| TRABSCOR         | 156.4974  | 87.2183 | 192.8802 | 94.0123 |
| FAQ              | 5.8042    | 7.6554  | 10.2934  | 9.7758  |

**Table S16.** Mild Cognitive Impairment vs Alzheimer Disease (phase 2) datasets. Mean and standard deviation of all the features used in these models, according to the dataset to which they belong, Orig is the Original dataset and Syn is the Synthetic dataset.
